# Supplementary material for: Approaches to comparative sequence analysis: towards a functional view of vertebrate genomes
Source: Springer Nature journal article supplement (doi:10.1038/nrg2185), 2008-03-18
Supplement: 41576_2008_BFnrg2185_MOESM1_ESM.pdf [file 41576_2008_BFnrg2185_MOESM1_ESM.pdf]

| Common name     | TaxonID | Scientific name                       |
|-----------------|---------|---------------------------------------|
| armadillo       | 9361    | <i>Dasyopus novemcinctus</i>          |
| baboon          | 9555    | <i>Papio anubis</i>                   |
| black lemur     | 30603   | <i>Eulemur macaco macaco</i>          |
| cat             | 9685    | <i>Felis catus</i>                    |
| chicken         | 9031    | <i>Gallus gallus</i>                  |
| chimp           | 9598    | <i>Pan troglodytes</i>                |
| chinese muntjak | 9886    | <i>Muntiacus reevesi</i>              |
| clouded leopard | 61452   | <i>Neofelis nebulosa</i>              |
| colobus monkey  | 33548   | <i>Colobus guereza</i>                |
| condor          | 33616   | <i>Gymnogyps californianus</i>        |
| cow             | 9913    | <i>Bos taurus</i>                     |
| didelphis       | 9267    | <i>Didelphis virginiana</i>           |
| dog             | 9615    | <i>Canis lupus familiaris</i>         |
| dogfish shark   | 7797    | <i>Squalus acanthias</i>              |
| dunnart         | 9302    | <i>Sminthopsis macroura</i>           |
| dusky titi      | 9523    | <i>Callicebus moloch</i>              |
| echidna         | 9261    | <i>Tachyglossus aculeatus</i>         |
| elephant        | 9785    | <i>Loxodonta africana</i>             |
| ferret          | 9669    | <i>Mustela putorius furo</i>          |
| flying fox      | 132908  | <i>Pteropus vampyrus</i>              |
| fugu            | 31033   | <i>Takifugu rubripes</i>              |
| galago          | 30611   | <i>Otolemur garnettii</i>             |
| gibbon          | 164929  | <i>Nomascus leucogenys leucogenys</i> |
| gorilla         | 9595    | <i>Gorilla gorilla gorilla</i>        |
| guinea pig      | 10141   | <i>Cavia porcellus</i>                |
| hedgehog        | 9365    | <i>Erinaceus europaeus</i>            |
| horse           | 9796    | <i>Equus caballus</i>                 |
| horseshoe bat   | 59479   | <i>Rhinolophus ferrumequinum</i>      |
| human           | 9606    | <i>Homo sapiens</i>                   |
| indian muntjak  | 9887    | <i>Muntiacus muntjak vaginalis</i>    |
| jamaican bat    | 9417    | <i>Artibeus jamaicensis</i>           |
| lemur           | 9447    | <i>Lemur catta</i>                    |

| Common name      | TaxonID | Scientific name                        |
|------------------|---------|----------------------------------------|
| little brown bat | 59463   | <i>Myotis lucifugus</i>                |
| lizard           | 28377   | <i>Anolis carolinensis</i>             |
| macaque          | 9544    | <i>Macaca mulatta</i>                  |
| marmoset         | 9483    | <i>Callithrix jacchus</i>              |
| medaka           | 8090    | <i>Oryzias latipes</i>                 |
| monodelphis      | 13616   | <i>Monodelphis domestica</i>           |
| mouse            | 10090   | <i>Mus musculus C57BL6/J</i>           |
| mouse lemur      | 30608   | <i>Microcebus murinus</i>              |
| nurse shark      | 7801    | <i>Ginglymostoma cirratum</i>          |
| orangutan        | 9601    | <i>Pongo abelii</i>                    |
| owl monkey       | 37293   | <i>Aotus nancymaae</i>                 |
| pig              | 9823    | <i>Sus scrofa</i>                      |
| platypus         | 9258    | <i>Ornithorhynchus anatinus</i>        |
| rabbit           | 9986    | <i>Oryctolagus cuniculus</i>           |
| rat              | 10116   | <i>Rattus norvegicus</i>               |
| rock hyrax       | 9813    | <i>Procavia capensis</i>               |
| sheep            | 9940    | <i>Ovis aries</i>                      |
| short-tailed bat | 40233   | <i>Carollia perspicillata</i>          |
| shrew            | 42254   | <i>Sorex araneus</i>                   |
| spider monkey    | 9509    | <i>Ateles geoffroyi</i>                |
| squirrel         | 43179   | <i>Spermophilus tridecemlineatus</i>   |
| squirrel monkey  | 39432   | <i>Saimiri boliviensis boliviensis</i> |
| stickleback      | 69293   | <i>Gasterosteus aculeatus</i>          |
| tenrec           | 9371    | <i>Echinops telfairi</i>               |
| tetraodon        | 99883   | <i>Tetraodon nigroviridis</i>          |
| tortoise         | 38772   | <i>Gopherus agassizii</i>              |
| tree shrew       | 37347   | <i>Tupaia belangeri</i>                |
| vervet           | 9534    | <i>Chlorocebus aethiops</i>            |
| wallaby          | 9315    | <i>Macropus eugenii</i>                |
| xenopus          | 8364    | <i>Xenopus tropicalis</i>              |
| zebrafinch       | 59729   | <i>Taeniopygia guttata</i>             |
| zebrafish        | 7955    | <i>Danio rerio</i>                     |
